tight regulation of RANKL expression through the OPG level compensates the inflammatory effect of a RANK-RANKL interaction in EAM.

### P318

#### Phosphoinositide 3-kinase gamma inhibition as a novel strategy to reactivate targeted autophagy and limit Doxorubicin-induced cardiotoxicity

M. Li<sup>1</sup>; V. Sala<sup>1</sup>; N. Pianca<sup>2</sup>; S. Sciarretta<sup>3</sup>; F. Morello<sup>4</sup>; M. Sandri<sup>2</sup>; M. Mongillo<sup>2</sup>; T. Zaglia<sup>2</sup>; E. Hirsch<sup>1</sup>; A. Ghigo<sup>1</sup>

<sup>1</sup>University of Turin, Department of Molecular Biotechnology and Health Sciences, Molecular Biotechnology Center, Turin, Italy; <sup>2</sup>University of Padova, Department of Biomedical Sciences and Venetian Institute of Molecular Medicine, Padova, Italy; <sup>3</sup>Sapienza University of Rome, Department of Medical and Surgical Sciences and Biotechnologies, Latina, Italy; <sup>4</sup>Hospital 'Città della Salute e della Scienza di Torino', S.C. Emergency Medicine, Turin, Italy

**Funding Acknowledgements:** Progetto d'Ateneo - Compagnia di San Paolo; 2013 International Society for Heart Research (ISHR)/Servier Research Fellowship to A.Ghigo

**Background:** Anthracyclines, like doxorubicin (DOX), are among the most potent antitumor drugs. However, their clinical use is hampered by severe cardiotoxicity. We previously demonstrated that inhibition of phosphoinositide 3-kinase  $\gamma$  (PI3K $\gamma$ ) protects against anthracycline-induced cardiomyopathy (manuscript under revision), but the underlying molecular mechanisms are still unexplored.

**Purpose:** Here, we further test the hypothesis that anthracycline-damaged mitochondria activate Toll-like receptor 9 (TLR9)/PI3K $\gamma$  signaling, which in turn inhibits protective autophagy, thus exacerbating anthracycline cardiotoxicity.

**Methods:** Neonatal cardiomyocytes (NCMs) were isolated from mice expressing a kinase inactive PI3K $\gamma$  (PI3K $\gamma$  kinase-dead; KD) and wild-type (WT) controls, and treated with DOX (1 mM) or TLR9 agonist ODN1826 (1  $\mu$ g/ml)  $\pm$  PI3K $\gamma$  inhibitor AS605240 (500 nM) or TLR9 antagonist ODN2088 (1  $\mu$ g/ml), for 1 hour before analyzing Akt/mTOR/ULK-1 signaling. For *in vivo* studies, WT and KD mice were treated with 4 mg/kg DOX weekly for 3 weeks. Cardiac function was analyzed with echocardiography 6 weeks after the first injection. Electron microscopy (EM) study of morphology and signaling transduction were studied 3 days after the treatment. To investigate the role of protective autophagy in KD hearts, mice were treated with hydroxychloroquine (HCQ) or AAV9-shATG7, which silences the autophagy regulator ATG7 specifically in cardiomyocytes, together with DOX, as described above.

**Results:** In NCMs, DOX significantly increased the phosphorylation of PI3K downstream targets and autophagy inhibitors, Akt, mTOR and ULK-1. These effects were completely prevented by the TLR9 antagonist ODN2088, the PI3K $\gamma$  selective inhibitor AS605240 and genetic PI3K $\gamma$  inactivation (KD NCMs). Notably, the TLR9 agonist ODN1826, mimicking mitochondrial DNA (mitoDNA), similarly upregulated Akt/mTOR/ULK-1 signaling in WT but not in KD NCMs. These results suggest that DOX activates PI3K $\gamma$  through mitoDNA/TLR9. *In vivo*, EM studies showed more abundance of autolysosomes containing injured mitochondria in KD than WT hearts, highlighting the efficient autophagy-dependent disposal of DOX-damaged mitochondria in KD mice. Enhanced activation of PI3K $\gamma$ -dependent pathway correlated with a significant blunt of autophagy in DOX-treated hearts, whereas inhibition of PI3K $\gamma$  promoted autophagy and decreased DOX-induced contractile dysfunction. Finally, inhibition of autophagy by HCQ or AAV9-shATG7 erased the protection in KD mice.

**Conclusion:** Overall, this study demonstrates that PI3K $\gamma$  prevents autophagic disposal of DOX-damaged mitochondria, resulting in cardiomyopathy. We propose PI3K $\gamma$  inhibition as a novel strategy to reactivate targeted autophagy and limit cancer therapy-related heart disease.

### P319

#### Bay 60-2770 attenuates doxorubicin-induced cardiotoxicity by preventing mitochondrial membrane potential loss

K.H. Lee<sup>1</sup>; X.X. Zhao<sup>2</sup>; H. Cho<sup>1</sup>; S.R. Lee<sup>1</sup>; J.S. Woo<sup>1</sup>; W. Kim<sup>1</sup>

<sup>1</sup>Kyunghee University, Department of cardiovascular of internal medicine, Seoul, Korea Republic of; <sup>2</sup>Kyung Hee Medical Center, Cardiovascular department, Seoul, Korea Republic of

**Funding Acknowledgements:** Basic Science Research Program through the National Research Foundation of Korea(NRF) funded by the Ministry of Education (NRF-2017R1C1B5075748).

**Objectives:** The highly effective anti-cancer agent doxorubicin (DOX) induces cardiotoxicity that involves increased oxidative stress, mitochondrial iron overload, DNA damage, necrosis and apoptosis. These effects are also associated with secondary tumorigenicity. Soluble guanylate cyclase (sGC) signaling is protective against cardiovascular disease and can chemosensitize cancer cells. The present study investigated the role of Bay 60-2770, an effective activator of oxidized and heme-free sGC, in alleviating DOX-induced cardiomyopathy (DOX-CM).

**Methods:** To quantify the protective effect of Bay 60-2770 on DOX-induced cardiac myocyte death and ROS generation, H9c2 cells were treated with 10  $\mu$ M Bay 60-2770 for 24 h prior to DOX treatment (0.5-10  $\mu$ M). Mitochondrial ROS and membrane potential were measured with MitoSOX RED and TMRE, respectively. To determine the role of Bay 60-2770 in DOX-CM, Bay 60-2770 was orally administered to 8-week-old male Sprague-Dawley rats 1 hour prior to every DOX treatment. LV dysfunction was then analyzed by echocardiography. The levels of autophagy-related proteins and mitochondrial iron-regulating proteins in the LV were analyzed. The % of autophagosomes in cardiac myocytes was examined by Cyto ID staining.

**Results:** Bay 60-2770 increased cell viability and reduced DOX-induced oxidative stress in H9c2 cells; these effects were mediated by PKG activation. Mitochondrial ROS and TMRE fluorescence were attenuated by Bay 60-2770 treatment in DOX-treated H9c2 cells. The ratio of Bax/Bcl-2 decreased after pre-treatment with Bay 60-2770, both *in vivo* and *in vitro*. Echocardiography demonstrated that pre-treatment with Bay 60-2770 significantly improved LV function. Moreover, Bay 60-2770 enhanced the protein expression of mitochondrial ferritin (MtFt) in heart tissue.

**Conclusion:** Bay 60-2770 reduces DOX-induced mitochondrial membrane potential loss and subsequent apoptosis. Moreover, improves cardiac function by upregulating MtFt and stimulating autophagy. These novel results highlight the therapeutic potential of Bay 60-2770 to prevent DOX-CM.

### P320

#### Contribution of oxidized low density lipoproteins to arrhythmogenic cardiomyopathy adipogenesis

E. Sommariva<sup>1</sup>; I. Stadiotti<sup>1</sup>; L. Arnaboldi<sup>2</sup>; A. Scopece<sup>1</sup>; S. Demetrio<sup>2</sup>; M. Casella<sup>3</sup>; G. Milano<sup>1</sup>; C. Tondo<sup>3</sup>; A. Corsini<sup>2</sup>; G. Pompilio<sup>1</sup>

<sup>1</sup>Cardiology Center Monzino IRCCS, Vascular Biology and Regenerative Medicine Unit, Milan, Italy;

<sup>2</sup>University of Milan, Milan, Italy; <sup>3</sup>Cardiology Center Monzino IRCCS, Cardiac Arrhythmia Research Center, Milan, Italy

**Funding Acknowledgements:** Telethon GGP16001, RC (Italian Ministry of health) 2014-2016

**Background:** Arrhythmogenic Cardiomyopathy (ACM) is a genetic condition characterized by progressive fibro-fatty replacement of the ventricular myocardium and malignant arrhythmias. We recently showed that Cardiac Mesenchymal Stromal Cells (C-MSC) in ACM hearts differentiate to adipocytes, through the activation of PPAR $\gamma$ .

The variable penetrance and expressivity of ACM suggest the involvement of co-determinants. Physical exercise is the only accepted co-factor. Strong physical activity increases oxidative stress (OxS). 13HODE, a component of oxidized low density lipoproteins (oxLDL), is a marker of exercise-induced OxS, and has been shown in macrophages to produce fat accumulation by increasing the expression of both PPAR $\gamma$  and the oxLDL receptor CD36.

**Purpose:** To evaluate the effects of OxS and oxLDL on ACM adipogenesis and to dissect underlying pathways.

**Methods:** We analyzed plasmas (n=34) and ventricular tissues (n=3) from ACM patients and matched healthy controls (HC). *In vitro* experiments have been carried out on ACM vs. HC human C-MSC (n=5), while *in vivo* experiments on the heterozygous PKP2 mouse model (PKP2 $^{+/-}$ ; n=5).

**Results:** Significantly higher plasmatic oxLDL were detected in ACM patients compared to HC (290.90 $\pm$ 76.31 vs. 122.40 $\pm$ 28.73 ng/ml; p=0.04). Moreover, oxLDL levels can discriminate between ACM patients with overt phenotype vs. their asymptomatic relatives carrying the same causative mutations (456.50 $\pm$ 187.80 vs. 93.81 $\pm$ 33.39 ng/ml; p=0.03). In human ventricular tissue, we observed higher OxS in ACM hearts vs. HC (malondialdehyde positivity 20.26 $\pm$ 6.54 fold higher; p=0.004).

In basal conditions, ACM C-MSC also showed higher OxS (dichlorofluorescein emission 5.64 $\pm$ 0.80 vs. 3.60 $\pm$ 0.36 a.u.; p=0.03) and 2.79 $\pm$ 1.32 fold higher expression of PPAR $\gamma$  (p=0.04) compared to HC C-MSC. Administration of 13HODE increased lipid accumulation in ACM C-MSC (Oil Red O (ORO) staining 1.28 $\pm$ 0.24 fold vs. untreated; p=0.02). On the contrary, treatment with the antioxidant N-Acetylcysteine (NAC) prevented lipid accumulation in ACM C-MSC (ORO staining 0.63 $\pm$ 0.16 fold vs. untreated; p=0.03). Lipid accumulation during adipogenic differentiation in ACM C-MSC paralleled with an increased surface expression of CD36 (R2= 0.93; p=0.03).

Despite PKP2 $^{+/-}$  mice do not spontaneously accumulate adipocytes in the heart, C-MSC obtained from PKP2 $^{+/-}$  mice hearts are more prone to lipid accumulation *in vitro* than WT cells (ORO staining 99.49 $\pm$ 27.36 fold higher; p=0.007). The increase of plasma cholesterol and OxS by administering a high-fat diet, resulted in fibro-fatty substitution in the heart of PKP2 $^{+/-}$  mice only (% ORO positive area 0.47 $\pm$ 0.15% in PKP2 $^{+/-}$  vs. 0.11 $\pm$ 0.01% in WT; p=0.009).

**Conclusions:** Mutations in ACM genes are necessary but not sufficient for ACM complete penetrance. We showed that elevated OxS and oxLDL are important cofactors of adipogenesis. Further investigations could provide new approaches for pharmacological prevention of ACM adipogenic phenotype

### P321

#### Genetic testing in arrhythmogenic cardiomyopathy: growing complexity embedded in doubts

R. Celegghin; E. Lazzarini; B. Bauce; M. Cason; I. Rigato; K. Ludwig; D. Corrado; G. Thiene; C. Basso; K. Pilichou

University of Padova, Department of Cardiac Thoracic and Vascular Sciences, Padova, Italy

**Introduction:** Arrhythmogenic cardiomyopathy (AC) is a heart muscle disease characterized by life-threatening ventricular arrhythmias and progressive dystrophy of the ventricular myocardium with fibro-fatty replacement. AC is defined as a rare disease due to an estimated prevalence of 1:5000. AC displays mostly an autosomal-dominant transmission and incomplete penetrance. It is considered a disease of desmosomes, however about 1% of AC patients harbor a mutation in non-desmosomal proteins such as CTNNA3, TMEM43, RYR2, TTN, LMNA, DES, PLN, SCN5A. Non-desmosomal proteins mutation frequency in AC patients might be underestimated due to gene size-related sequencing and interpretation difficulties.

The aim of this study was to assess the frequency of non desmosomal rare variants in AC patients.

**Methods:** 189 consecutive AC index cases, fulfilling revised 2010 Task Force Criteria, underwent DNA sequencing on the MiSeq platform (Illumina) using the TruSight Cardio panel (174genes). Variant selection was based on current ACMG guidelines: a minor allele frequency (MAF) <0.0001 threshold in the general population, amino acid conservation across species and pathogenicity based on at least two *in silico* prediction algorithms. Cascade genetic screening in probands' families was performed to study the segregation of rare variants and their impact on the clinical phenotype.

**Results:** Almost 45% (85/189) of AC index cases carried a rare nucleotide variant in AC-related genes: 40% (76/189) were desmosomal variant carriers and 5% (9/189) displayed rare variants in non-desmosomal AC-related genes (CTNNA3, DES, LMNA, SCN5A, TMEM43). Specifically, 18 were single-variant DSP carriers, 9 DSG2, 23 PKP2, 7 DSC2, 3 JUP, and 16 patients were compound or digenic heterozygous carriers in desmosomal genes.

All 85 genotype positive but also 104 genotype negative AC cases carried rare variants in AC-unrelated genes, mostly encoding sarcomeric proteins (OBSN, MYH7, MYBPC3) or ion channels subunits (CACNA1B, CACNA1C, SCN10A, KCNQ1, KCND3). Interestingly 26% (51/189) of patients carried at least a rare variant in the TNN; its significance was assessed by cascade genetic screening.

**Conclusions:** Analysis of a large AC cohort reveals a combination of multiple rare variants in AC related and unrelated genes. Preliminary data demonstrate a high frequency of rare TTN variants in AC patients, which role in the etiopathogenesis of AC as modulatory factor will be clarified by
